# Supplementary material for: Ku80 is involved in telomere maintenance but dispensable for genomic stability in Leishmania mexicana
Source: PLoS Negl Trop Dis. 2021 Dec 29;15(12):e0010041. doi: 10.1371/journal.pntd.0010041 (PMC8716037; doi:10.1371/journal.pntd.0010041)
Supplement: S2 Table — (XLSX) [file pntd.0010041.s002.xlsx]

## Sheet: S2 Table
	Median (min - max) of telomere length, bp
WT	389 (253 - 1 695)
ΔKu70	584 (257 - 3 381)
ΔKu80	564 (253 - 3 291)
Ku80_add	387 (252 - 1 852)
ΔKu80_cl1	495 (253 - 2 803)
ΔKu80_cl2	518 (253 - 2 940)
ΔKu80_cl3	466 (253 - 3 055)
Ku80_add_cl1	445 (253 - 1 862)
Ku80_add_cl2	431 (253 - 2 394)
Ku80_add_cl3	409 (253 - 1 650)
